# Supplementary material for: Return to work after carpal tunnel release surgery: a qualitative interview study
Source: PubMed Central journal article supplement (PMC6530142; doi:10.1186/s12891-019-2638-5), 2019-05-22
Supplement: 12891_2019_2638_MOESM1_ESM.pdf [file 12891_2019_2638_MOESM1_ESM.pdf]

## Qualitative Interview Topic Guide

Check agree to audio recording

Assure confidentiality

### Introduction

The aim of this stage of the REACTS study is for me to talk to individuals who had carpal tunnel release surgery. I want to talk to you about your experience of the surgery and of returning to work afterwards. There are no right or wrong views. I am interested in hearing about your experience.

1. Can I start by asking: how does your work involve you using your arms and hands day-to-day?
  - *Prompt time schedule and breaks*
  - *Prompt repetitive activities – duration*
  - *Prompt heavy loads – frequency and duration*
  - *Prompt computer use - duration*
  - *Prompt any change in role as result of CTS/CTR*
2. Please tell me a bit about your hands and wrists felt before you had surgery?
  - *Prompt impact on work*
  - *Prompt impact on function and social activities*
  - *Prompt bilateral/unilateral*
3. How do your hands feel now?
4. How did you decide to have the carpal tunnel release surgery?
  - *Prompt clinic experience*
  - *Prompt referral process*
  - *Prompt pre-operative information about expected outcomes*
  - *Prompt any discussion about work*
  - *Prompt trial of splints/injections – how did they work for you?*
5. What sort of information were you given about your surgery and going back to work afterwards?
  - *Prompt pre-operative information and from whom*
  - *Prompt sick note/fit note – from whom, and any extension to the initial note*
  - *Prompt other sources of information (internet, friends and family)*
  - *Prompt satisfaction with information/advice provided*
  - *Prompt awareness of potential for complications eg infection, prolonged scar pain, weakness that could affect return to work*
  - *Prompt any other information that would have been useful*
  - *Prompt comments on the format of the information*
6. What medical treatment did you receive after your surgery?
  - *Prompt removal of sutures*
  - *Prompt physio/OT/splint*
  - *Prompt any contact with GP or occupational health*

- *Prompt treatment for complications*
7. How did you decide when to return to work?
- *Prompt clinical signs/advice given*
  - *Prompt – how confident in using hand*
  - *Prompt amended duties*
  - *Prompt altered hours*
  - *Prompt occupational health*
  - *Prompt RTW criteria specified by employer*
  - *Prompt any contact with workplace whilst off work*
  - *Prompt driving/transport*
  - *Prompt financial*
  - *Prompt co-workers*
8. Tell me about your return to work – and how it went?
- *Prompt anything that was particularly helpful for you when returning to work?*
  - *Prompt anything about your job or workplace that made it harder for you to return to work?*
  - *Prompt hand dominance*
  - *Prompt boss/co-workers*
  - *Prompt job satisfaction*
9. Do you think you were 100% fit to do your job when you returned to work?
- *Prompt what percentage ‘fit’ do you think you were?*
  - *Prompt components of your job could you do despite not being 100% fit?*
  - *Prompt anything you couldn’t do?*
  - *Prompt thoughts about return for different jobs*
  - *Prompt what where your employer’s views – amended duties*
10. While off work how did you manage with your home or family commitments?
- *Prompt washing, showering, personal care*
  - *Prompt cooking, shopping*
  - *Prompt assistance from others*
  - *Prompt not doing all usual activities*
11. Now, with the benefit of your experience, what advice would you give about returning to work to a friend who needed a carpal tunnel release?
12. Is there that you would like to add about returning to work after your surgery that we haven’t discussed?

Thank you  
Assure confidentiality
